# Supplementary material for: Metagenomic data-mining reveals contrasting microbial populations responsible for trimethylamine formation in human gut and marine ecosystems
Source: PubMed Central journal article supplement (PMC5537630; doi:10.1099/mgen.0.000080), 2016-09-20

# A. Riske monooxygenase alpha subunit family

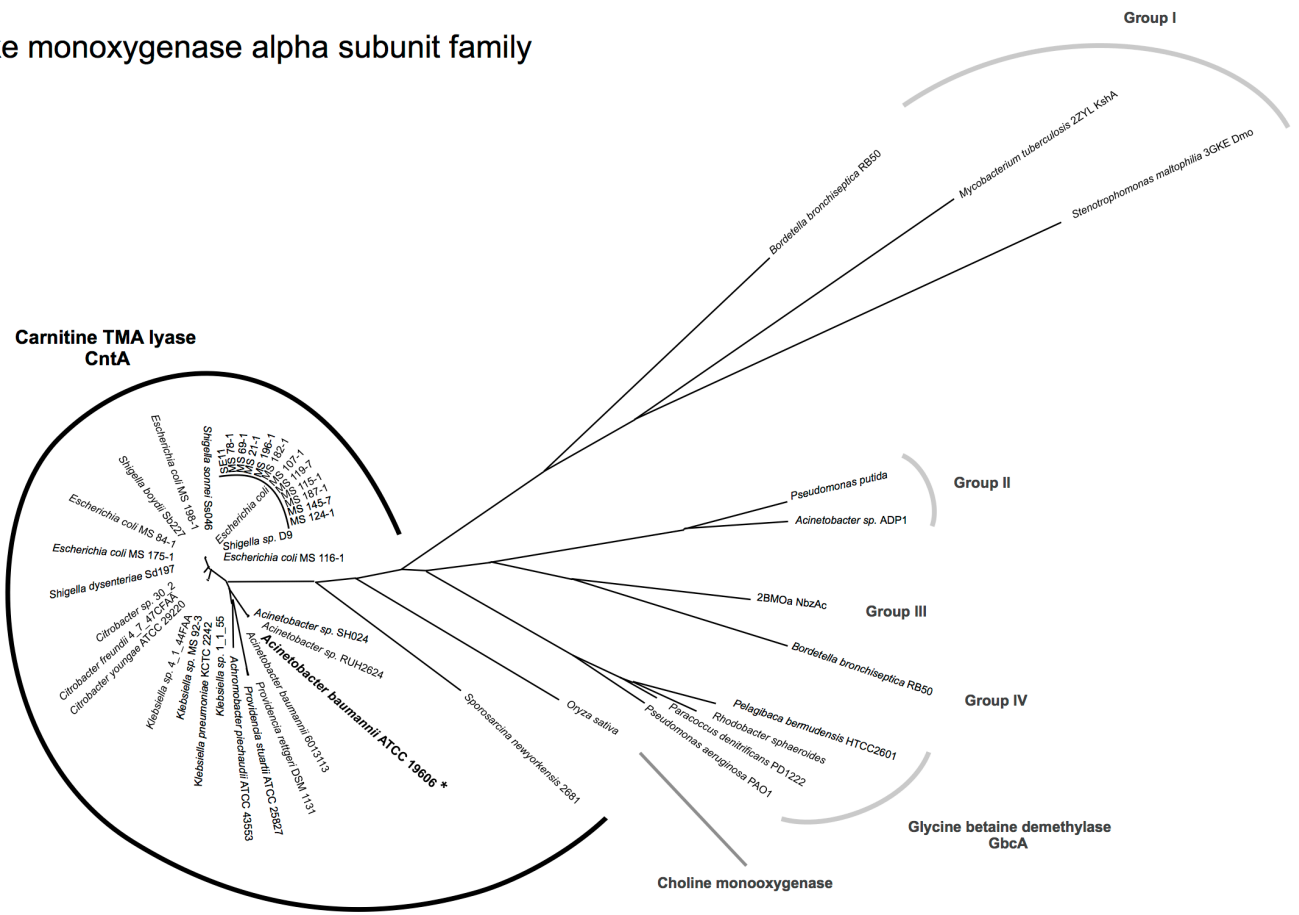

## B. Glycine/betaine/sarcosine/D-proline reductase family

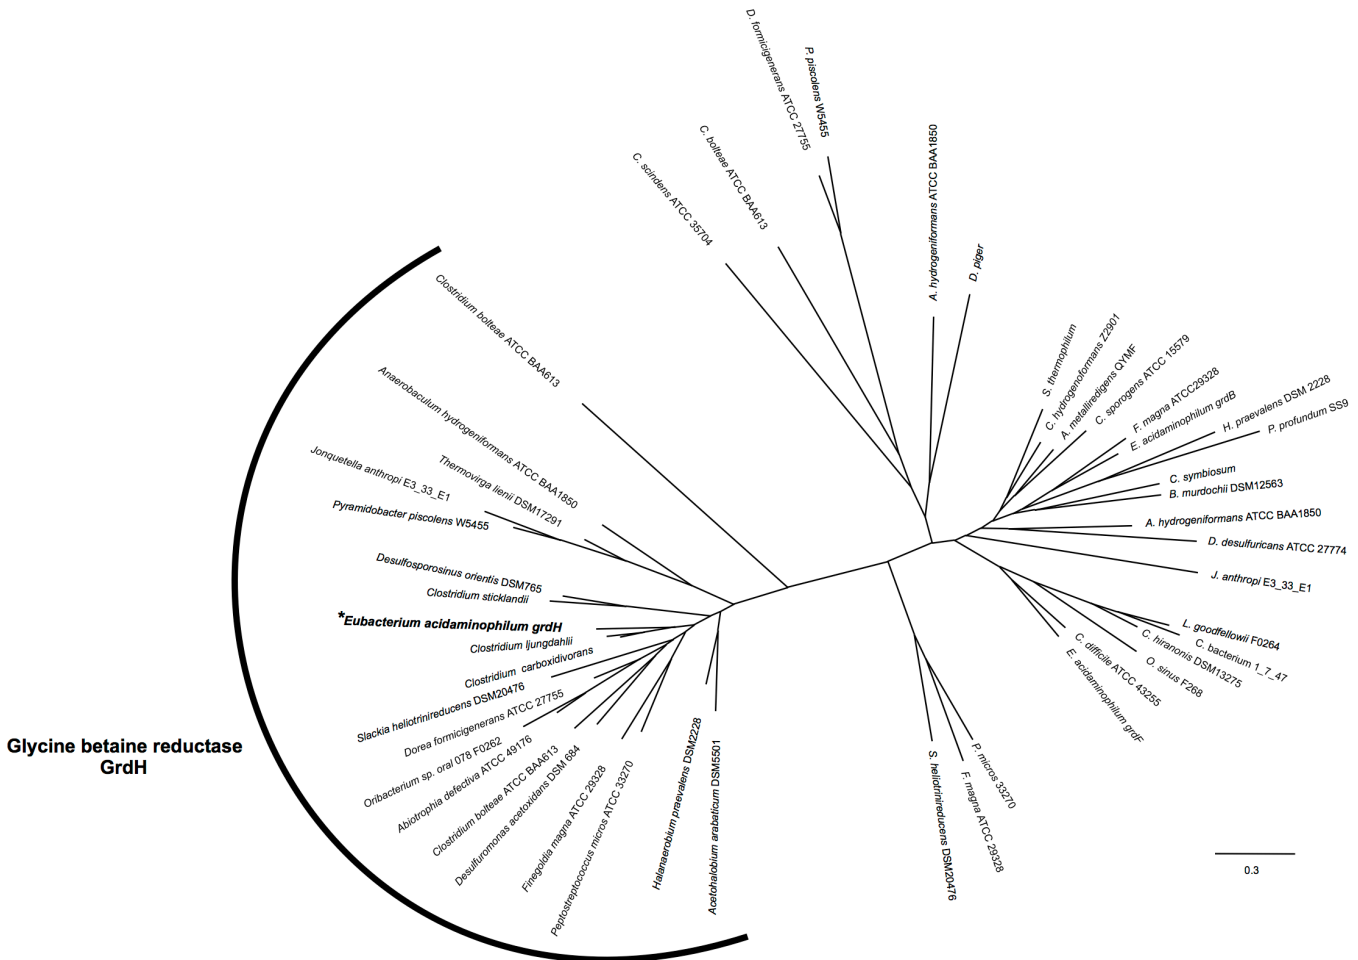

### C. Pyruvate formate lyase family

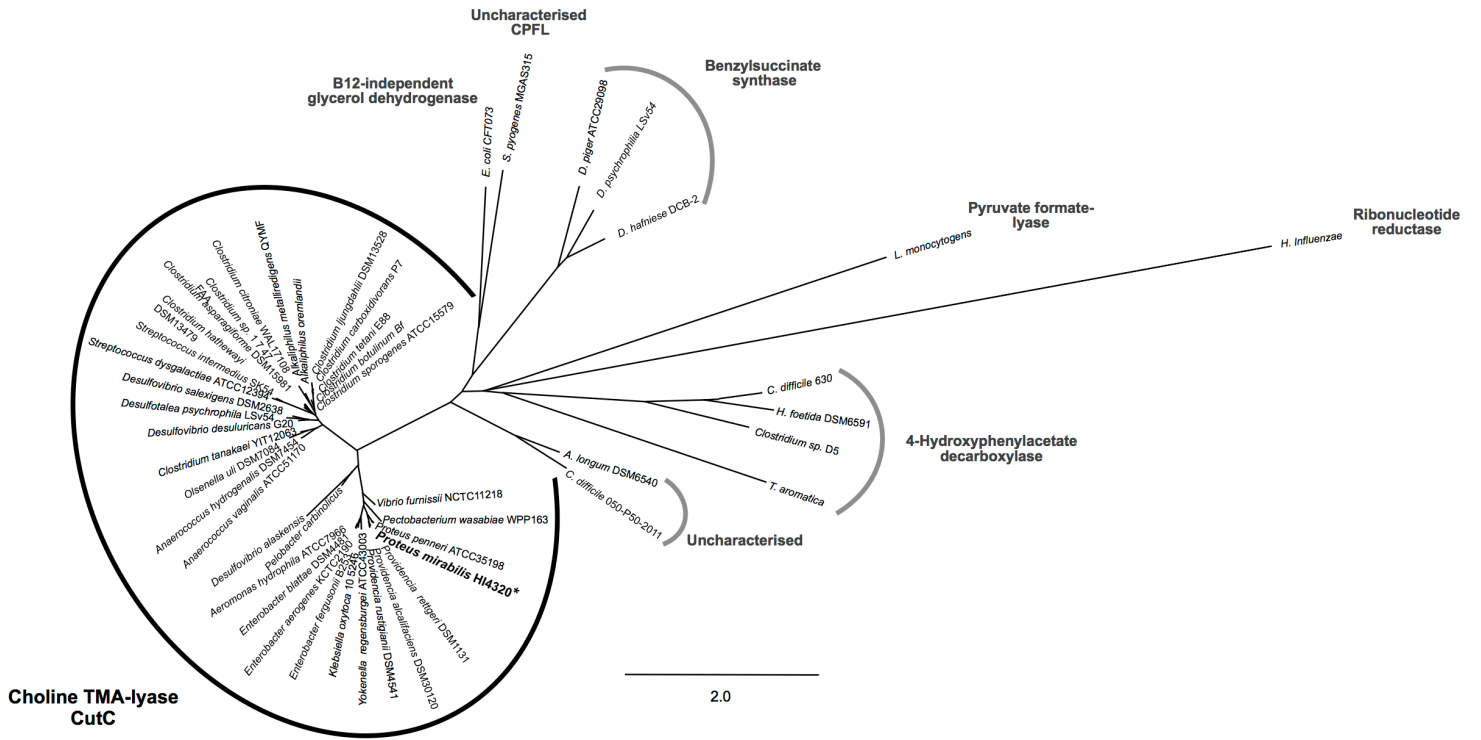

## D. Molybdopterin oxidoreductase family

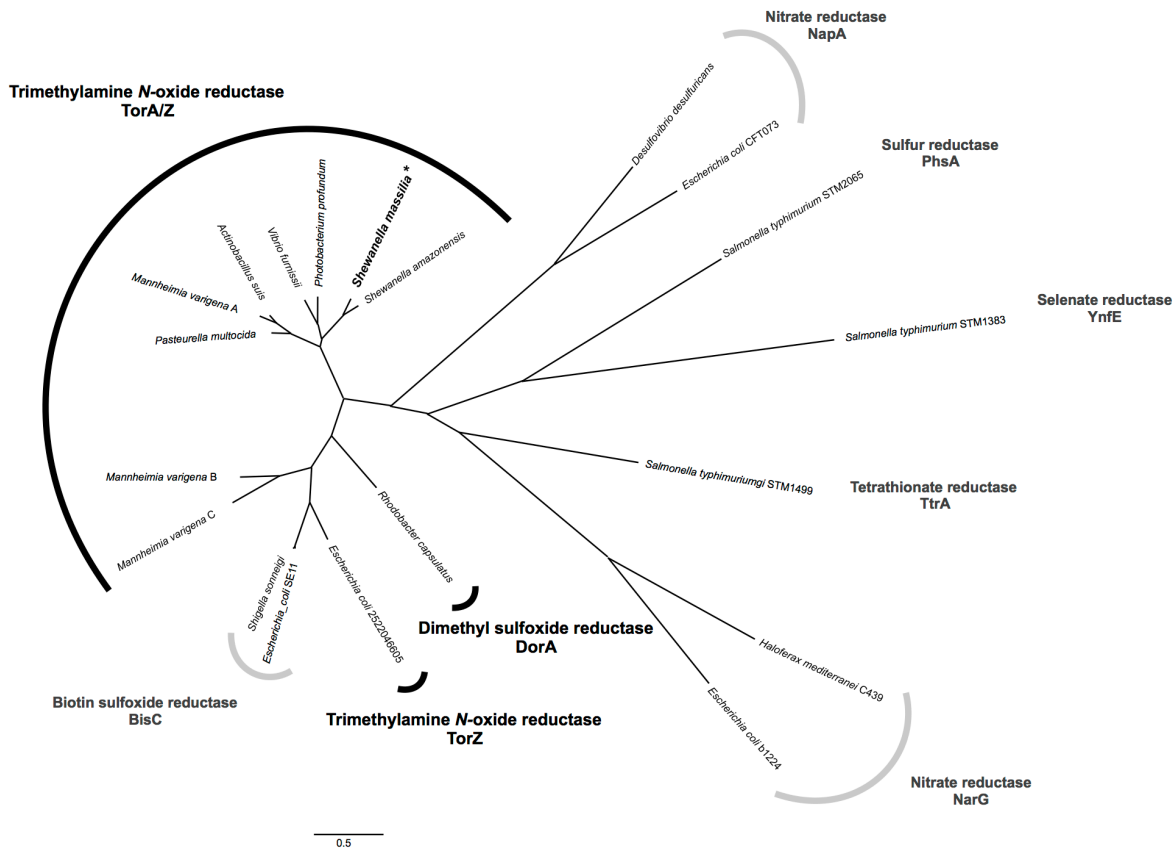

Supplement: mgen-02-80-s001.pdf [file mgen-02-80-s001.pdf]
